# Supplementary material for: Characterization of intestinal immune responses in generalized human and murine lipodystrophy
Source: JCI journal article supplement (doi:10.1172/jci192322), 2026-03-16
Supplement: sd1 [file 1]

## Supplemental Materials Letizia et al.

### Supplemental Experimental Procedures

#### *Isolation of lamina propria mononuclear cells (LPMCs) from ileal resectates*

Ileal mucosa of the AGLCD Patient, CD Patients or non-inflamed controls was dissected, washed in 1 mM 1,4 dithiothreitol (DTT) (#6908.4, Carl Roth), and dissolved in Hanks' balanced salt solution (HBSS) w/o  $\text{Ca}^{2+}$  and  $\text{Mg}^{2+}$  (Thermofisher Scientific). Lamina propria tissue was cleaned of any left submucosa, cut into pieces, and washed three times in 1 mM EDTA (#E6511, Sigma-Aldrich) for 15 min at 37 °C in shaking condition at 250 rpm. The EDTA was then washed out with HBSS without  $\text{Ca}^{2+}$  and  $\text{Mg}^{2+}$  (Thermofisher Scientific), and the tissue was incubated in a digestion medium supplemented with 0.15 mg/mL collagenase A (Roche) for 16 hours at 37 °C in shaking condition at 200 rpm (**Supplemental Table 2**). On the following day, the supernatant was filtered through a 100  $\mu\text{m}$  cell strainer (Thermofisher Scientific) and washed three times in HBSS without  $\text{Ca}^{2+}$  and  $\text{Mg}^{2+}$ . Cells were separated by centrifugation on a Percoll gradient (GE Healthcare) at 300 g for 30 min at 4 °C. Lymphocytes and monocytes were isolated from the 40-60% Percoll (GE Healthcare) interface, washed twice, and used for downstream assays.

#### *Cell stimulation and mass cytometry staining*

LPMCs were ex-vivo stimulated with ionomycin/PMA for 4h (see **Supplemental Table 2** for information on media used for activation) and 10  $\mu\text{g}/\text{mL}$  brefeldin A (Sigma-Aldrich) was added to all samples for the last 2 h of stimulation, while 25 KU benzonase nuclease (Sigma-Aldrich) was added (1:10,000) 15 min before harvesting. LPMCs were then fixed in Smart Tube buffer (SMART TUBE) supplemented with 20% BSA (Sigma-Aldrich) and subsequently stored at -80 °C until antibody staining and acquisition. On the day of acquisition, single cell suspensions were thawed, and to pool multiple samples in single batch/acquisition run (max 40 samples per batch/run) to avoid introducing batch effects, LPMCs samples were pooled and barcoded for 30 min at room temperature (RT) using the Cell-ID 20-plex Pd Barcoding Kit (Fluidigm)  $\pm$  CD45-89Y staining. Individual samples were washed twice with cell staining buffer (Fluidigm) and pooled before staining. Anti-

human antibodies were either purchased pre-conjugated to metal isotopes or conjugated in-house using the MaxPar X8 conjugation kit (Fluidigm). A full description of antibodies used is provided in **Supplemental Table 3**. Cells were incubated for surface staining for 30 min at 4 °C, washed twice with cell staining buffer, and incubated in fixation/permeabilization buffer (eBioscience) for 60 min at 4 °C. After two washes with permeabilization buffer (eBioscience), cells were stained with an antibody cocktail against intracellular molecules for 1 hour at 4°C. Cells were then washed twice with permeabilization buffer and incubated overnight in 2% methanol-free formaldehyde solution (ThermoFisher Scientific) for 1 hour at room temperature. LPMCs were then washed and resuspended in 1 mL of iridium intercalator solution (Fluidigm) for 1 hour at RT. Finally, cells were washed twice with cell staining buffer and then twice with double-distilled water (ddH<sub>2</sub>O) for time-of-flight (CyTOF) mass cytometry measurements. Cells were acquired using a CyTOF2 upgraded to Helios specifications (Fluidigm), with software version 6.5.236.

#### *Analysis of mass cytometry data*

The Cytobank software package ([www.cytobank.org](http://www.cytobank.org)) was used for the initial manual gating of single cells and the de-barcoding of pooled samples. FCS files of de-barcoded single cells were exported and further compensated for signal spillover using the R software (3.6.0, Bioconductor 9) ([www.R-project.org](http://www.R-project.org)) and by applying the CATALYST package and arcsinh transformation (scale factor 5) prior to data analysis (1). Compensated files were then gated for CD45<sup>+</sup> cells (**Supplemental Figure 1**), and t-distributed stochastic neighbor embedding (t-SNE) maps were generated according to the expression of lineage and/or functional markers. T-sne maps were generated according to the expression of lineage markers for T (CD4, CD8, CD45RO, CD45RA, CCR7, IL-7R, CD27, CD25, PD-1, perforin), B (CD38, CD19), NK (CD56) and myeloid cells (CD11b, CD11c) (**Figure 1C, D**). For all analyses, FCS files with t-SNE embedding as two additional parameters were exported from Cytobank. Clustering analysis was performed using the *FlowSOM/ConsensusClusterPlus* package in R (3.6.0, Bioconductor 9) (2). Cell clusters of LPMCs were identified after visual inspection of t-SNE plots and functional interpretation of heat maps generated by FlowSOM/ConsensusClusterPlus.

Statistical analysis of differential abundance (DA) clusters between disease groups was performed using a generalized linear mixed effects model (GLMM) available through the R package *diffcyt* (using all defaults with `analysis_type = "DA,"` `method_DA = "diffcyt-DA-GLMM,"` `min-cells = 3`). The false discovery rate (FDR) was adjusted to 10% using the Benjamini-Hochberg (BH) procedure for multiple hypothesis testing, as previously described (3). Multiple t-test (Benjamini, Krieger, and Yekutieli two-stage linear step-up procedure, with  $Q = 1\%$ ) was used to analyze protein expression levels among disease groups.

#### *Whole exome sequencing*

PBMCs were obtained from the AGLCD Patient and DNA was extracted from PBMC subsets or buccal swaps using DNeasy Blood & Tissue Kits (#69504, Qiagen, North Rhine-Westphalia, Germany). Exome sequencing was performed by the Institute of Clinical Molecular Biology, Kiel, Germany, using the xGen Exome Research Panel v 1.0 and  $2 \times 75$  bp paired-end, while the sequencing was carried out on an Illumina HiSeq 3000 (Illumina), as previously reported (4, 5). Reads were mapped to the human reference genome assembly hg19 using BWA (6). They were then sorted, converted to bam format, and indexed using SAMtools (6). This was followed by PCR duplicate removal (<http://picard.sourceforge.net>) and local realignment around InDels followed together with base quality score recalibration using GATK according to their best practice recommendations, in accordance with variant calling and variant quality score recalibration. Finally, Alissa Interpret (Agilent) was used for Variant annotation and filtering. Exome enrichment was performed by the Center for Molecular Biosciences (ZMB), Kiel, Germany, using the xGen Exome Research Panel v 1.0 and  $2 \times 75$  bp paired-end, while the sequencing was carried out on an Illumina HiSeq 3000 (Illumina). Reads were overlapped to the human reference genome assembly hg19 using BWA, sorted, converted to bam format, and indexed using SAMtools. This was followed by PCR duplicate removal and local realignment around InDels followed together with base quality score recalibration using the GATK. Finally, Alissa Interpret (Agilent) was used for Variant annotation and filtering.

### *Single cell RNA sequencing*

PBMCs or LPMCs were collected from the AGLCD patient, 3 healthy donor or 3 Crohn's disease patients as indicated and resuspended in 1X PBS (#10010023, Gibco) containing 2% FBS (Sigma-Aldrich) and 1 mM EDTA (#E6511, Sigma-Aldrich) at a density of  $5 \times 10^7$  cells/mL. Single cell suspensions were loaded onto a Chromium Chip G (10x Genomics, Pleasanton, California) according to the manufacturer's instructions for processing with the Chromium Next GEM Single Cell 5' Library and Gel Bead Kit v1.1. 15,000 cells were loaded for each reaction. TCR single cell libraries were subsequently generated from the same cells using the Chromium Single Cell V(D)J Enrichment Kit, Human T Cell (10x Genomics). Libraries were sequenced on the Illumina NovaSeq 6000 machine (Illumina) using 2x100 bp for gene expression, aiming for 50,000 reads per cell and 2x150 bp and 5000 reads per cell for TCR libraries. Raw FASTQ files were processed with Cell Ranger v9.1.0 (10x Genomics) using the GRCh38-2024-A reference for gene-expression (GEX) libraries and vdj\_GRCh38\_alts\_ensembl-7.1.0 for VDJ libraries. Ambient RNA contamination was corrected using CellBender remove-background v0.3.2, applied to raw count matrices before downstream QC. Per-sample 10x 5' scRNA-seq matrices were imported into Seurat v5.2.1 (R) and QC metrics annotated using scCustomize v3.1.4. Cells were retained if they expressed >800 and <5,500 genes, contained >500 UMIs, and had <20% mitochondrial transcripts. Data were then log normalized, variable features selected using VST (nfeatures = 2000), and scaled. Putative doublets were identified per sample using DoubletFinder v2.0.4 with pN = 0.25, pK optimized via paramSweep, and a 7.5% expected doublet rate. Filtered objects were merged and then mapped to the human 10k PBMC reference using Azimuth weighted-nearest-neighbor embeddings (RunAzimuth, reference = "pbmcref"). Differential cell-type abundances were tested on arcsine-square-root-transformed per-sample proportions using propeller.ttest and limma (speckle v1.2.0) with empirical-Bayes variance moderation (robust = TRUE, trend = FALSE). Effects with 95% confidence intervals were reported, and significance defined at FDR < 0.05. Clonotype repertoires were visualized with enclone v0.5.219 and

clonotypes defined using the CTstrict criterion in scRepertoire v2.5.2, requiring identical CDR3 amino acid sequences and V/J gene usage within each chain (TRA/TRB). Clonotype expansions were defined using the Large expansion category in scRepertoire, corresponding to highly expanded clones that additionally contained more than 50 cells per clonotype. Differential gene expression analyses were performed in Seurat (v5.2.1) using FindMarkers (Wilcoxon rank-sum test; logfc.threshold = 0, min.pct = 0.05), retaining genes with BH-adjusted FDR < 0.05 and absolute log<sub>2</sub> fold change ≥ 0.25. Gene lists were ranked by log<sub>2</sub> fold change and subjected to gene set enrichment analysis using fgsea v1.30.0 with MSigDB HALLMARK pathways (minSize = 10, maxSize = 500), reporting normalized enrichment scores and adjusted P values. All DGE and GSEA analyses were tissue- and cell-type-matched and performed at the clonotype/condition-pseudobulk level where appropriate. To quantify NRAS G13D variant-supporting reads per cell, BAM files were split by cellular barcode and base pileups at the locus generated with samtools mpileup (-r chr1:114716123-114716123 -q 10 -Q 10) and cells counted as mutated with at least one read supporting the C>T substitution. All random operations used set.seed(1234).

#### *Stool scoring during mouse DSS treatment*

Stool consistency was determined as follows: score 0, normal (solid pellet); 1, soft but in pellet shape; 2, loose stool but with some solidity; 3, loose stool with signs of liquid consistency; 4, watery diarrhea. Rectal bleeding was scored as follows: score 0, no sign of blood; score 1, no bleeding; 2, slight bleeding; 3, bloody diarrhea; 4, gross bleeding (7).

#### *Processing of mouse spleens and mesenteric lymph nodes for single cell suspension*

Spleens and mesenteric lymph nodes from lipodystrophic mice and control littermates were dissociated and filtered through a 70 μM cell strainer (Thermofisher Scientific) using MACS buffer consisting of PBS (Gibco) supplemented with 0.5% Fraction V bovine serum albumin (BSA) (Sigma-Aldrich). For red blood cell (RBC) lysis, cells were resuspended in RBC lysis buffer (8.9 g NH<sub>4</sub>Cl, 1 g KHCO<sub>3</sub>, 0.038 g EDTA, 1 L distilled water) for 2 min at RT, then washed and filtered again through a 40 μM cell strainer (Thermofisher Scientific). Alternatively, terminal ileum and colon sections were opened

longitudinally and cut into small pieces for two washes in 1 mM EDTA solution (Sigma-Aldrich) for 15 min at 37 °C under shaking conditions at 250 rpm. Tissue pieces were then digested in complete media supplemented with 200 U/mL Collagenase D (Roche) for 90 min under shaking conditions (250-300 rpm, 37 °C). Cells were then subjected to a 40/100% discontinuous Percoll gradient (GE Healthcare), 1200 g for 25 min at RT, to obtain mononuclear cell fractions. Finally, cell pellets were washed and resuspended for activation at 37 °C for 4 hours in RPMI medium 1640 (1X) (Gibco), supplemented with 10% fetal bovine serum (FBS) (Sigma-Aldrich), 10% penicillin-streptomycin (ThermoFisher Scientific), 50 µM 2-mercaptoethanol (Gibco). Single-cell solutions were then stained with antibodies listed in **Supplemental Table 5** and further processed using standard FACS-protocols.

#### *Stool 16S sequencing*

10 ng of stool genomic DNA was used in 25 cycle PCR amplification (NEBNext Q5 Hot Start HiFi PCR Master Mix, New England Biolabs) of genomic 16S ribosomal RNA V4 regions using the prokaryotic primer pair (515F forward primer: 5'-GTGYCAGCMGCCGCGGTAA-3'; 806R reverse primer: 5'-GGACTACNVGGGTWTCTAAT-3') containing 12 bp barcodes on the forward primer (<https://earthmicrobiome.org/protocols-and-standards/16s/>). PCR products were purified with AMPure XP Beads (Beckmann Coulter), pooled in equimolar ratios and analysed by 2 × 151 paired-end sequencing on an Illumina MiSeq device. Raw fastq files were then imported and analysed in QIIME2 v2025.4 with DADA2 as the method for quality control, dereplication and amplicon sequence variant (ASV) table generation. The SILVA small subunit database release 138.2 was used at a 99% similarity cut-off for taxonomic classification. ASV and taxonomic tables were imported into R (version 4.5) as a phyloseq object and the “vegan” (2.6.4) package was used for diversity analysis and ordination. Ggplot2 was used for generation of graphical illustrations.

#### *Bulk RNA sequencing*

Total RNA was sequenced on an Illumina platform. HISAT2 (8) was used to perform alignments to the *Mus musculus* reference genome assembly GRCm38 (mm10) after data quality control and filtering. After gene expression quantification,

the differential gene expression analysis was performed using DESeq2 software, and significant differences were considered if  $|\log_2(\text{FoldChange})| \geq 1$  &  $\text{padj} \leq 0.05$ . Downstream pathway and gene enrichment analyses were performed using the g:Profiler platform (9) or the GSEA 4.3.2 software (9).

#### *Ussing chamber experiments*

Voltage and transepithelial resistance (TER;  $R^t$ ) of murine colonic mucosal samples were measured in Ussing chambers with an area of 0.049 cm<sup>2</sup>. Resistance of bathing solution and filter was measured prior to each experiment and subtracted. Ussing chambers and water-jacketed gas lifts were filled with 10 ml standard Ringer's solution, which was equilibrated with 5% CO<sub>2</sub> and 95% O<sub>2</sub> at 37 °C. Potential changes were recorded when the solution of one hemichamber was changed to a solution containing a reduced concentration of NaCl and all other components identical to standard Ringer's; osmolality was balanced by mannitol. Sodium and chloride permeabilities were calculated from the resulting dilution potentials and the Goldman-Hodgkin-Katz equation as previously reported (10, 11).

#### *Flux measurements*

Dextran fluxes were measured in 5 ml circulating Ringer's solution under short-circuit conditions. 50 µL of 40 mM dialyzed fluorescein isothiocyanate-labeled dextran (4-kDa FITC-dextran; #60842-46-8, TdB Labs A B) were added to the mucosal side and unlabeled dextran of the same concentration to the serosal side. Serosal samples (300 µL) were taken and replaced by fresh solution at 0, 15, 30, 45, and 60 min. Tracer fluxes were calculated from the collected samples measuring the concentrations with a fluorometer at 520 nm (Tecan Infinite M200, Tecan).

#### *Western blot analyses*

For the analysis of tight junction proteins, distal colon specimens were mechanically disassociated in an ice-cold membrane lysis buffer using a FastPrep-24 homogenizer (MP Biomedical). After the first centrifugation (1000 g, 5 min, 4 °C), supernatants were

once more centrifuged (42,000 g, 30 min, 4 °C) for membrane protein collection. The protein fraction was resolved in total lysis buffer and incubated 5 min at 95 °C in Laemmli buffer (See **Supplemental Table 6** for details on buffers and reagents). Samples were loaded on a 5% stacking gel and then separated on a 12% SDS polyacrylamide gel and transferred onto a polyvinylidene fluoride (PVDF) membrane (Perkin Elmer). PVDF Membranes were blocked in blocking solution and incubated overnight with primary antibodies (**Supplemental Table 7**) at 4 °C on a shaker. Membranes were washed in 1X Tris-buffered saline with 0.1% Tween® 20 solution and incubated with the respective peroxidase-conjugated secondary antibodies (Dako). Finally, membranes were washed, incubated in SuperSignalWest Pico PLUS buffer (ThermoFisher) and detected using a Fusion FX7 chemiluminescence imager (Vilber Lourmat). Densitometric analysis was performed using AIDA software (Elysia), and all values were normalized to the  $\beta$ -actin signal of the respective blot.

#### *Calcium influx measurements in mice splenocytes*

Splenocytes were isolated from lipodystrophic mice or Wildtype littermates and stained with 2  $\mu$ g/mL calcium-sensing dye Fluo-4 AM (ThermoFisher Scientific) for 30 min on ice followed by an anti-mouse antibody cocktail targeting surface markers for T cells (CD4, CD8) for 15 min on ice in the dark. Cells were then washed using PBS supplemented with 10% FBS before being resuspended in 0 mM  $\text{Ca}^{2+}$  Ringer's solution (see in **Supplemental Table 8**). Baseline intracellular  $\text{Ca}^{2+}$  ( $f_0$ ) was then measured for 30 or 40 seconds. Cells were then stimulated with 1  $\mu$ M thapsigargin (Merck), and after 300 seconds a final concentration of 2 mM  $\text{Ca}^{2+}$ -containing Ringer's solution was added. The sample was then acquired for another 120 seconds. The mean fluorescence intensity (MFI) of Fluo-4 ( $f$ ) was normalized to the mean MFI detected during the 40-second baseline measurement ( $f_0$ ), and the resulting  $f/f_0$  ratio was plotted against a time (t) axis. Graphs were generated using GraphPad Prism v.9 software (GraphPad).

#### *Plasma treatment for calcium measurement*

Spleens were isolated from WT mice and processed for splenocytes as described above. Cell pellets were washed and resuspended in RPMI medium 1640 (1X) (Gibco),

supplemented with 10% penicillin-streptomycin (ThermoFisher Scientific), 50  $\mu$ M 2-mercaptoethanol (Gibco) and 10% fetal bovine serum (FBS; Sigma-Aldrich). For experimental conditions, cultures additionally contained 10% pooled plasma from either WT or lipodystrophic mice. Cells were incubated for 16 h at 37 °C with 5% CO<sub>2</sub>, followed by staining for intracellular calcium as previously described.

### **Supplementary References**

1. Chevrier S, Crowell HL, Zanotelli VRT, Engler S, Robinson MD, and Bodenmiller B. Compensation of Signal Spillover in Suspension and Imaging Mass Cytometry. *Cell Syst.* 2018;6(5):612–20 e5.
2. Nowicka M, Krieg, C., Crowell, H.L., Weber, L.M., Hartmann, F.J., Guglietta, S., Becher, B., Levesque, M.P., Robinson, MD. CyTOF workflow: differential discovery in high-throughput high-dimensional cytometry datasets. *F1000Research.* 2019.
3. Bottcher C, Fernandez-Zapata C, Schlickeiser S, Kunkel D, Schulz AR, Mei HE, et al. Multi-parameter immune profiling of peripheral blood mononuclear cells by multiplexed single-cell mass cytometry in patients with early multiple sclerosis. *Sci Rep.* 2019;9(1):19471.
4. Hecker J, Letizia M, Loescher BS, Siegmund B, and Weidinger C. Early Onset of TNF $\alpha$ -Driven Arthritis, Auto-inflammation, and Progressive Loss of Vision in a Patient with ALPK1 Mutation. *J Clin Immunol.* 2022;42(4):880–4.
5. Ziegler JF, Bottcher C, Letizia M, Yerinde C, Wu H, Freise I, et al. Leptin induces TNF $\alpha$ -dependent inflammation in acquired generalized lipodystrophy and combined Crohn's disease. *Nat Commun.* 2019;10(1):5629.
6. Li H, and Durbin R. Fast and accurate short read alignment with Burrows-Wheeler transform. *Bioinformatics.* 2009;25(14):1754–60.
7. Chan SSM, Chen Y, Casey K, Olen O, Ludvigsson JF, Carbonnel F, et al. Obesity is Associated With Increased Risk of Crohn's disease, but not Ulcerative Colitis: A Pooled Analysis of Five Prospective Cohort Studies. *Clin Gastroenterol Hepatol.* 2022;20(5):1048–58.
8. Mortazavi A, Williams BA, McCue K, Schaeffer L, and Wold B. Mapping and quantifying mammalian transcriptomes by RNA-Seq. *Nat Methods.* 2008;5(7):621–8.
9. Raudvere U, Kolberg L, Kuzmin I, Arak T, Adler P, Peterson H, et al. g:Profiler: a web server for functional enrichment analysis and conversions of gene lists (2019 update). *Nucleic Acids Res.* 2019;47(W1):W191–W8.
10. Weiss F, Czichos C, Knobe L, Voges L, Bojarski C, Michel G, et al. MarvelD3 Is Upregulated in Ulcerative Colitis and Has Attenuating Effects during Colitis Indirectly Stabilizing the Intestinal Barrier. *Cells.* 2022;11(9).
11. Srinivasan B, Kolli AR, Esch MB, Abaci HE, Shuler ML, and Hickman JJ. TEER measurement techniques for in vitro barrier model systems. *J Lab Autom.* 2015;20(2):107–26.

**Supplemental Table 1.** Clinical and demographic characteristics of cohorts included in the different experimental methods

| Experiment (total number)                                                               | PMBC scRNAseq (n= 8)    |               |                | LPMC scRNAseq (n= 4)    |               | CyTOF (n=11)     |               |                  |
|-----------------------------------------------------------------------------------------|-------------------------|---------------|----------------|-------------------------|---------------|------------------|---------------|------------------|
| <i>Cohorts' characteristics</i>                                                         | Crohn's disease         | AGLCD         | Healthy        | Crohn's disease         | AGLCD         | Crohn's disease  | AGLCD         | Non-IBD          |
| number (%)                                                                              | 3 (37.5%)               | 1 (12.5%)     | 4 (50.0%)      | 3 (75%)                 | 1 (25%)       | 6 (54.55%)       | 1 (9.09%)     | 4 (36.36%)       |
| Mean age at inclusion in years (range)                                                  | 36.8 (25-46)            | (29-33)       | 34.5 (30-39)   | 36.8 (25-46)            | (29-33)       | 55 (39-71)       | (29-33)       | 73.33 (69-77)    |
| Males number (%)                                                                        | 1 (33.3%)               | 1 (100.00%)   | 4 (100.00%)    | 1 (33.3%)               | 1 (100.00%)   | 1 (16.67%)       | 1 (100.00%)   | 3 (75.00%)       |
| BMI (range)                                                                             | 25.8 (24.2-28.08)       | 17            | 22.9 (21.1-24) | 25.8 (24.2-28.08)       | 17            | 25.8 (23.8-28.1) | 17            | 23.8 (23.6-24)   |
| Percentage of current or prior aminosalicylates medication (5-ASA)                      | 66.67%                  | 100.00%       | 0.00%          | 66.67%                  | 100.00%       | 33.33%           | 100.00%       | 0.00%            |
| Percentage of current or prior corticosteroids medication (Prednisolon, Hydrocortisone) | 100.00%                 | 100.00%       | 0.00%          | 100.00%                 | 100.00%       | 50.00%           | 100.00%       | 0.00%            |
| Percentage of current or prior immunomodulators medication (Tac)                        | 0.00%                   | 100.00%       | 0.00%          | 0.00%                   | 100.00%       | 0.00%            | 100.00%       | 0.00%            |
| Percentage of current or prior biologic therapies (agent used)                          | 100.00% (IFX, ADA, UST) | 100.00% (IFX) | 0.00%          | 100.00% (IFX, ADA, UST) | 100.00% (IFX) | 66.67% (ADA)     | 100.00% (IFX) | 0.00%            |
| Chemotherapy at inclusion                                                               | 0.00%                   | 0.00%         | 0.00%          | 0.00%                   | 0.00%         | 0.00%            | 0.00%         | 25.00%           |
| Mean leucocyte count per nl at inclusion (range)                                        | 7.62 (4.45-9.52)        | ---           | ---            | 7.62 (4.45-9.52)        | ---           | 5.69 (4.01-9.52) | ---           | 7.11 (5.77-8.47) |

Tacrolimus (Tac), infliximab (IFX), adalimumab (ADA), and ustekinumab (UST).

**Supplemental Table 2. Cell culture and in vitro assays medium**

| <b>Complete Medium</b>                         | <b>Cat. No.</b> | <b>Company</b>                |
|------------------------------------------------|-----------------|-------------------------------|
| RPMI Medium 1640 (1X)                          | #11875093       | Gibco                         |
| 10% Fetal bovine serum (FBS)                   | ---             | Sigma-Aldrich                 |
| 10% Penicillin-Streptomycin                    | #15140122       | Thermofisher Scientific       |
| <b>Activation Medium</b>                       | ---             | ---                           |
| RPMI Medium 1640 (1X)                          | #11875093       | Gibco                         |
| 10% FBS                                        | ---             | Sigma-Aldrich                 |
| 10% Penicillin-Streptomycin                    | #15140122       | Thermofisher Scientific       |
| 50 µM 2-Mercaptoethanol                        | #31350010       | Gibco                         |
| 20 ng/ml phorbol 12-myristate 13-acetate (PMA) | #P8139          | Sigma-Aldrich                 |
| 1 µg/ml ionomycin                              | #I0634          | Sigma-Aldrich                 |
| <b>T cell expansion Medium</b>                 | ---             | ---                           |
| RPMI Medium 1640 (1X)                          | #11875093       | Gibco                         |
| 10% FBS                                        | ---             | Sigma-Aldrich                 |
| 10% Penicillin-Streptomycin                    | #15140122       | Thermofisher Scientific       |
| 50 µM 2-Mercaptoethanol                        | #31350010       | Gibco                         |
| 250 U/ml human recombinant IL-2                | #200-02         | PeproTech, Rocky Hills, New   |
| 1:100 or 1:500 T Cell TransAct™, human         | #130-111-160    | Miltenyi Biotec, NRW, Germany |
| <b>Human LPMC digestion Medium</b>             | ---             | ---                           |
| RPMI Medium 1640 (1X)                          | #11875093       | Gibco                         |
| 10% FBS                                        | ---             | Sigma-Aldrich                 |
| 10% Penicillin-Streptomycin                    | #15140122       | Thermofisher Scientific       |
| 0.15 mg/ml collagenase A                       | #11088793001    | Roche, Basel, Switzerland     |
| <b>Murine LPMC digestion Medium</b>            | ---             | ---                           |
| RPMI Medium 1640 (1X)                          | #11875093       | Gibco                         |
| 10% FBS                                        | ---             | Sigma-Aldrich                 |
| 10% Penicillin-Streptomycin                    | #15140122       | Thermofisher Scientific       |
| 200 U/ml collagenase D                         | #11088858001    | Roche                         |

**Supplemental Table 3: Anti-human antibodies used in mass cytometry**

| <b>Metal</b> | <b>Target</b> | <b>Clone</b> | <b>Cat. No./ Company</b> | <b>Dilution</b> |
|--------------|---------------|--------------|--------------------------|-----------------|
| 89Y          | CD45          | HI30         | #3089003B / Fluidigm     | 1:100           |
| 141Pr        | CD45          | HI30         | #3141009B / Fluidigm     | 1:100           |
| 142Nd        | CD19          | HIB19        | #3142001B / Fluidigm     | 1:100           |
| 143Nd        | CD45RA        | HI100        | #3143006B / Fluidigm     | 1:100           |
| 144Nd        | IL-4          | MP4-25D2     | #3144010B / Fluidigm     | 1:100           |
| 145Nd        | CD4           | RPA-T4       | #3145001B / Fluidigm     | 1:50            |
| 146Nd        | TNF $\alpha$  | Mab11        | #3146010B / Fluidigm     | 1:100           |
| 147Sm        | CD11c         | Bu15         | #3147008B / Fluidigm     | 1:200           |
| 148Nd        | IgA           | Polyclonal   | #3148007B / Fluidigm     | 1:100           |
| 149Sm        | CD25          | 2A3          | #3149010B / Fluidigm     | 1:100           |
| 150 Nd       | CD86          | IT2.2        | #3150020B / Fluidigm     | 1:100           |
| 151Eu        | CD103         | Ber-ACT8     | #3151011B / Fluidigm     | 1:100           |
| 152Sm        | CD95/Fas      | DX2          | #3152017B / Fluidigm     | 1:200           |
| 153Eu        | IgM           | MHM-88       | #314502 / Biolegend      | 1:200           |
| 154Sm        | CD3           | UCTH1        | #3154003B / Fluidigm     | 1:100           |
| 155Gd        | CD56          | B159         | #3155008B / Fluidigm     | 1:100           |
| 156Gd        | IL-6          | MQ2-13AS     | #3156011B / Fluidigm     | 1:100           |
| 158Gd        | IFN $\gamma$  | B27          | #3158017 / Fluidigm      | 1:400           |
| 159Tb        | CCR7          | G043H7       | #3159003C / Fluidigm     | 1:200           |
| 160Gd        | CD27          | O323         | #302802 / Biolegend      | 1:200           |
| 161Dy        | IL-10         | JES3-9D7     | #3161008B / Fluidigm     | 1:100           |
| 161Dy        | IL-23p19      | 23dcdp       | #3161010B / Fluidigm     | 1:100           |
| 162Dy        | CD8           | RPA-T8       | #3162015B / Fluidigm     | 1:100           |
| 163Dy        | CD33          | WM53         | #3163023B / Fluidigm     | 1:100           |
| 163Dy        | Granzyme B    | QA16A02      | #3173006B / Fluidigm     | 1:100           |
| 164Dy        | CD45RO        | UCHL1        | #3164007B / Fluidigm     | 1:100           |
| 165Ho        | CD40          | 5C3          | #3165005B / Fluidigm     | 1:100           |
| 166Er        | IL-2          | MQ117H12     | #3166002B / Fluidigm     | 1:100           |
| 167Er        | CD38          | HIT2         | #3167001B / Fluidigm     | 1:200           |
| 168Er        | CD40L         | 24-31        | #3168006B / Fluidigm     | 1:100           |
| 169Tm        | IL-13         | JES105A2     | #3169016 / Fluidigm      | 1:100           |
| 170Er        | CD137         | 4B4-1        | #3209015B / Biolegend    | 1:100           |
| 171Yb        | CD178/FasL    | NOK-1        | #306402 / Biolegend      | 1:100           |
| 172Yb        | IL-17         | BL168        | #3172020B / Fluidigm     | 1:100           |
| 173Yb        | HLA-DR        | L243         | #3173005B / Fluidigm     | 1:200           |
| 174Yb        | PD-1          | EH12.2H7     | #3174020B / Fluidigm     | 1:200           |
| 175Lu        | CD14          | M5E2         | #3175015B / Fluidigm     | 1:50            |
| 175Lu        | Perforin      | B-D48        | #3175004B / Fluidigm     | 1:100           |
| 176Yb        | IL-7R         | A019D5       | #3176004B / Fluidigm     | 1:50            |
| 209Bi        | CD11b         | ICRF44       | #3209003B / Fluidigm     | 1:100           |

### Supplemental Table 4. Anti-human antibodies flow cytometry

| Fluorochrome | Target | Clone  | Cat. No. / Company             | Dilution |
|--------------|--------|--------|--------------------------------|----------|
| FITC         | CD14   | 61D3   | #11-0149-42 / eBioscience      | 1:50     |
| FITC         | CD19   | HIB19  | #11-0199-42 / eBioscience      | 1:100    |
| Pe-Cy7       | CD16   | 3G8    | #560918 / BD                   | 1:200    |
| APC          | CD14   | 63D3   | #367118 / Biolegend            | 1:50     |
| APC          | CD4    | RPA-T4 | #555349 / BD                   | 1:100    |
| APC          | CD3    | OKT3   | #17-0037-42 / eBioscience      | 1:100    |
| APC          | CD56   | TULY56 | #17-0566-42 / eBioscience      | 1:200    |
| APC-Cy7      | CD19   | HIB-19 | #302218 / Biolegend            | 1:100    |
| APC-Cy7      | CD8    | SK1    | #344713 / Biolegend            | 1:100    |
| Viogreen     | CD3    | REA613 | #130-113-142 / Miltenyi Biotec | 1:100    |
| BV510        | CD4    | RPA-TA | #300546 / Biolegend            | 1:100    |

### Supplemental Table 5. Anti-mouse antibodies for flow cytometry

| Fluorochrome  | Target        | Clone        | Cat. No. / Company             | Dilution |
|---------------|---------------|--------------|--------------------------------|----------|
| FITC          | CD4           | GK1.5        | #100406 / Biolegend            | 1:100    |
| A488          | Eomes         | Dan11mag     | #53-4875-80 / eBioscience      | 1:100    |
| PE            | Foxp3         | FJK-16s      | #12-5773-82 / eBioscience      | 1:100    |
| PE            | NK1.1         | PK136        | #12-5941-81 / eBioscience      | 1:200    |
| PE            | CD49a         | REA493       | #130-124-706 / Miltenyi Biotec | 1:50     |
| PerCP-Cy5.5   | IL-17A        | TC11-18H10.1 | #506920 / Biolegend            | 1:200    |
| PerCP-Cy5.5   | CD3           | 145-2C11     | #551163 / BD                   | 1:200    |
| PerCP-Cy5.5   | CD27          | LG.3A10      | #124214 / BD                   | 1:100    |
| PerCP-Cy5.5   | NK1.1         | PK136        | #108728 / Biolegend            | 1:50     |
| Pe-Cy7        | TNF $\alpha$  | MP6-XT22     | #557644 / BD                   | 1:200    |
| Pe-Cy7        | F4/80         | BM8          | #123118 / Biolegend            | 1:300    |
| Pe-Cy7        | CD49b         | DX-5         | #12-5971-82 / eBioscience      | 1:50     |
| APC           | IFN $\gamma$  | XMG1.2       | #554413 / BD                   | 1:200    |
| APC           | T-bet         | 4B10         | #644814 / Biolegend            | 1:500    |
| APC-Cy7       | CD4           | GK1.5        | # 100414 / Biolegend           | 1:500    |
| APC-Cy7       | CD45          | 30-F11       | #103116 / Biolegend            | 1:200    |
| APC-Cy7       | CD11b         | M1/70        | #101226 / Biolegend            | 1:100    |
| APC-Cy7       | GR-1          | RB6-8C5      | #108434 / BD                   | 1:200    |
| APC-Cy7       | CD19          | 6D5          | #115530 / Biolegend            | 1:50     |
| APC-Cy7       | F4/80         | BM8          | #123118 / Biolegend            | 1:200    |
| APC-Cy7       | CD3e          | 145-2C11     | #557596 / BD                   | 1:50     |
| APC-Cy7       | FcER1a        | MAR-1        | #134326 / Biolegend            | 1:100    |
| eFluor450     | CD8a          | 53-6.7       | #48-0081-82 / eBioscience      | 1:200    |
| BV421         | GR-1          | RB6-8C5      | #108434 / Biolegend            | 1:200    |
| BV421         | CD11b         | M1/70        | #101236 / Biolegend            | 1:100    |
| V500          | CD45          | 30-F11       | #561487 / BD                   | 1:200    |
| Zombie Violet | Viability Dye |              | #423114 / Biolegend            | 1:1000   |
| Zombie Aqua   | Viability Dye |              | #423102 / Biolegend            | 1:1000   |
| eFluor780     | Viability Dye |              | #65-0865-14 / eBioscience      | 1:1000   |

**Supplemental Table 6. Buffers used in western blotting**

| <b>Tissue lysis buffer</b>                                                       | <b>Catalog number (Cat. No.)</b> | <b>Company</b>                     |
|----------------------------------------------------------------------------------|----------------------------------|------------------------------------|
| 1 M Tris-HCl pH 7.4                                                              | #9090.3                          | Carl Roth, Karlsruhe, Germany      |
| 1 M MgCl <sub>2</sub>                                                            | #5833                            | Merck, Darmstadt, Germany          |
| 0.5 M ethylenediaminetetraacetic acid (EDTA)                                     | #E6511                           | Sigma-Aldrich, St. Louis, Missouri |
| 0.5 M ethylene glycol-bis (β-aminoethyl ether)-N,N,N',N'-tetraacetic acid (EGTA) | #324626                          | Sigma-Aldrich                      |
| Protease inhibitor cocktail                                                      | #P8340                           | Sigma-Aldrich                      |
| <b>RIPA buffer cocktail</b>                                                      | ---                              | ---                                |
| 1X RIPA Buffer                                                                   | #R0278                           | Merck                              |
| 14X Protease inhibitor cocktail I                                                | #20-201                          | Merck                              |
| 10X Phosphatase inhibitor cocktail                                               | #P5726                           | Merck                              |
| 200mM NaVO <sub>4</sub>                                                          | #S6508                           | Merck                              |
| 200mM NaF                                                                        | #106449                          | Merck                              |
| <b>8% Sodium dodecyl sulfate (SDS) running gel</b>                               | ---                              | ---                                |
| 40% acrylamide mix                                                               | #1610140                         | Biorad                             |
| 5 mM Tris base pH 8.8                                                            | #4855.2                          | Carl Roth                          |
| 10% SDS                                                                          | #2326.2                          | Carl Roth                          |
| 10% ammonium persulfate (APS)                                                    | #7727-54-0                       | Sigma-Aldrich                      |
| 1% tetramethylethylenediamine (TEMED)                                            | #161-0800                        | Biorad                             |
| <b>5% Stacking gel</b>                                                           | ---                              | ---                                |
| 40% acrylamide mix                                                               | #1610140                         | Biorad                             |
| 1.0 M Tris base pH 6.8                                                           | #4855.2                          | Carl Roth                          |
| 10% SDS                                                                          | #2326.2                          | Carl Roth                          |
| 10% APS                                                                          | #7727-54-0                       | Sigma-Aldrich                      |
| 1% TEMED                                                                         | #161-0800                        | Biorad                             |
| <b>Laemmli buffer (6X)</b>                                                       | ---                              | ---                                |
| 60 mM Tris-HCl pH 6.8                                                            | #9090.3                          | Carl Roth                          |
| 12% SDS                                                                          | #2326.2                          | Carl Roth                          |
| 47% glycerol                                                                     | #3783.1                          | Carl Roth                          |
| 0.06% bromophenol blue                                                           | #8122                            | Merck                              |
| 12.5% β-mercaptoethanol                                                          | #60-24-2                         | Sigma-Aldrich                      |
| <b>Electrophoresis buffer (10X)</b>                                              | ---                              | ---                                |
| 144 g glycine                                                                    | #3908.3                          | Carl Roth                          |
| 30 g Tris base                                                                   | #4855.5                          | Carl Roth                          |
| 10 g SDS                                                                         | #2326.2                          | Carl Roth                          |
| 1 L distilled water                                                              | ---                              | ---                                |
| <b>Transfer buffer (10X)</b>                                                     | ---                              | ---                                |
| 30.3 g Tris base                                                                 | #4855.5                          | Carl Roth                          |
| 144 g glycine                                                                    | #3908.3                          | Carl Roth                          |
| 1 L distilled water                                                              | ---                              | ---                                |
| <b>Transfer buffer (1X)</b>                                                      | ---                              | ---                                |
| 100 ml transfer buffer (10X)                                                     | ---                              | ---                                |
| 200 ml 100% methanol                                                             | #32213                           | Merck                              |
| 700 ml distilled water                                                           | ---                              | ---                                |
| <b>Tris-Buffered Saline (TBS) pH 7.6 (10X)</b>                                   | ---                              | ---                                |
| 24 g Tris base                                                                   | #4855.2                          | Carl Roth                          |
| 88 g NaCl                                                                        | #9265.2                          | Carl Roth                          |

|                                                  |            |               |
|--------------------------------------------------|------------|---------------|
| 1 L distilled water                              | ---        | ---           |
| <b>Tris-Buffered Saline-Tween20 (TBS-T) (1X)</b> | ---        | ---           |
| 100 ml TBS pH 7.6 (10X)                          | ---        | ---           |
| 1 ml Tween                                       | #9127.1    | Carl Roth     |
| 900 ml distilled water                           | ---        | ---           |
| <b>5% Blocking buffer</b>                        | ---        | ---           |
| 2.5 g bovine serum albumin (BSA) (Fraction V)    | #9048-46-8 | Sigma-Aldrich |
| 50 ml TBS-T (1X)                                 | ---        | ---           |
| 2.5 mM L-glutamine                               | #56-85-9   | Sigma-Aldrich |

### Supplemental Table 7. Antibodies used for western blot

| Target | Clone      | Cat. No. / Company                       | Dilution |
|--------|------------|------------------------------------------|----------|
| CLDN1  | Polyclonal | #19000 / Invitrogen                      | 1:1000   |
| CLDN2  | MH44       | #16100 / Invitrogen                      | 1:1000   |
| CLDN3  | Polyclonal | #41700 / Invitrogen                      | 1:1000   |
| CLDN4  | 3E2C1      | #29400 / Invitrogen                      | 1:1000   |
| CLDN7  | Polyclonal | #49100 / Invitrogen                      | 1:1000   |
| OCCL   | Polyclonal | #711500 / Invitrogen                     | 1:1000   |
| TRIC   | 54H19L38   | #700191 / Invitrogen                     | 1:1000   |
| MD3    | Polyclonal | #5567-1-AP/ Proteintech,<br>Rosemont, IL | 1:1000   |
| ZO-1   | ZO1-1A12   | #33-9100 / Invitrogen                    | 1:1000   |
| LSR    | Polyclonal | #HPA007270 / Atlas antibodies            | 1:1000   |
| ILDR1  | Polyclonal | #bs-11013R / Thermofisher                | 1:1000   |
| ACTB   | AC-15      | #A5441 / Sigma-Aldrich                   | 1:10,000 |

### Supplemental Table 8. Buffers used for Ca<sup>2+</sup> influx

| Ringer Solution          | Cat. No.    | Company |
|--------------------------|-------------|---------|
| 155 mM NaCl              | #9265.2     | Merck   |
| 4.5 mM KCl               | #7447-40-7  | Merck   |
| 3 mM MgCl <sub>2</sub>   | #5833       | Merck   |
| 10 mM D-glucose          | #X997.2     | Merck   |
| 5 mM Na-HEPES            | #75277-39-3 | Merck   |
| ± 4 mM CaCl <sub>2</sub> | #2.382      | Merck   |

# Supplemental Table 9. Top 10 expanded clonotypes per sample in the AGLCD patient

| Sample        | Rank in sample | CTelrict                                                                                                                                           | CTaa                                 | Number of cells | Clonal proportion |
|---------------|----------------|----------------------------------------------------------------------------------------------------------------------------------------------------|--------------------------------------|-----------------|-------------------|
| LFMC_AGLCD_T1 | 1              | TRAV8-1.TRAJ13.TRAC:GTGGCGGTGACCCGCGGGGGGGCTTCTGGGGTTACAGAAAGTTACCTTT TRBV6-5.TRBD1.TRB1-2.TRBC1:GTGCCAGCAGTACTTCCGCGCCGGACAGGGTTCTATGGCTACACCTTC  | CAVTAGGASGGYQKVF_CASSYFPFGTFYGYTF    | 526             | 0.058353672       |
| LFMC_AGLCD_T1 | 2              | TRAV1-2.TRAJ41.TRAC:GTGGCTGTGAGAGGAGTCCGGGTATGCACTCAACTTC TRBV27 TRBJ2-4.TRBC2:GTGCCAGCAGTCTCACCGTCAAAACATTCACTACTTC                               | CAVREDSGYALNF_CASSLTKVNIQVF          | 153             | 0.016973597       |
| LFMC_AGLCD_T1 | 3              | TRAV12-3.TRAJ15.TRAC:GTGGCAATGAGCGGCAAGAGGGAGGAAGTCTGTGATCTTT TRBV5-5.TRB1-6.TRBC1:GTGGCAGCAGCCTTACCAGCTGGCAGGTTCCACCCTCCACTTT                     | CAMSAKEAGTALF_CASSLTDASGSLPHF        | 120             | 0.013312625       |
| LFMC_AGLCD_T1 | 4              | TRAV12-2.TRAJ37.TRAC:GTGGCGGTGATCCCTGTTTCTGGTGGCTACAATAAGCTGATTTT TRBV20-1 TRBJ2-3.TRBC2:TGCAGTGTAGAGATGACGCTGGACGGGTCCTTACACAGATACGCAGTATTTT      | CAVILFSSGGYNLIF_CSARDRPRVLYDTQYF     | 93              | 0.010317284       |
| LFMC_AGLCD_T1 | 5              | TRAV28-2.TRAJ37.TRAC:TGCATCCGACCCCTCTAGCAACACAGCAACAACTACTTT TRBV9 TRBJ2-7.TRBC2:GTGGCAGCAGCGGATAGCGGGGCGAGGACCCGAGCAGTACTTC                       | CILTPSSNTGKLIIF_CASSPSSGLRPEQYF      | 80              | 0.008875083       |
| LFMC_AGLCD_T1 | 6              | TRAV29/DV5.TRAJ49.TRAC:GTGGCAGCAGCGGGCAATTCGGGTAAACAGTCTACTTT TRBV9 TRBJ1-2.TRBC1:GTGGCAGCAGCCAGGTCCTCGGGGAAGTATGGCTACACCTTC                       | CAASGAISSGNYFY_CASSPSSGLRNYGYTF      | 70              | 0.007756988       |
| LFMC_AGLCD_T1 | 7              | TRAV12-2.TRAJ8.TRAC:GTGGCCGACAGAGAAAGAACACAGGCTTCAGAAACTTGTATTT TRBV19 TRBJ1-1.TRBC1:GTGGCAGTATGATACACATGAACACTGAAGCTTCTTT                         | CAAREMINTGKLVF_CASSIDNTEAFF          | 55              | 0.00610162        |
| LFMC_AGLCD_T1 | 8              | TRAV14/DV4.TRAJ9.TRAC:GTGGCAATGAGAGAGGGCTCAGTAGGCTTCAAACATCTTT TRBV14.TRB1-1.TRBC1:GTGGCAGCAGCGGGAGGACAGGATGAACACTGAAGCTTCTTT                      | CAMREGSYGFKLIF_CASRRDRVNTAEFF        | 52              | 0.005768804       |
| LFMC_AGLCD_T1 | 9              | TRAV4.TRAJ17.TRAC:TGCCTCGTGGTGGAGGGGCTCAGGCAACAAGTAACTTT TRBV9 TRBJ2-5.TRBC2:GTGGCAGCAGCCATACCGGGGGGCGGGGAGAGCCAGTACTTC                            | CLVGEAAGNKLIF_CASSAIAAGPGETQYF       | 52              | 0.005768804       |
| LFMC_AGLCD_T1 | 10             | TRAV35.TRAJ49.TRAC:GTGGTGGCTTTCGAACACCGGTAACCAAGTCTACTTT TRBV5-1.TRB1-2.TRBC1:GTGGCAGCAGCTTGAAGGGATGGCTACACCTTC                                    | CAGLSNNTGNQFYF_CASSLEGYGYTF          | 51              | 0.005667866       |
| PFMC_AGLCD_T1 | 1              | TRAV30.TRAJ49.TRAC:GTGGCAGCAGCACCGGTAAACAGTCTACTTT TRBV5-6.TRB1-5.TRBC1:GTGGCAGCAGCTTGGGGACCCCGGAGCAATCAGCCCCAGCACTTT                              | CGTDTGNQFYF_CASSLWGRNSNPQHF          | 56              | 0.014238495       |
| PFMC_AGLCD_T1 | 2              | TRAV28-1.TRAJ49.TRAC:TGCATCGTCAGAGGAGGACCGGTAAACAGTCTACTTT TRBV4-2 TRBJ1-6.TRBC1:GTGGCAGCAGCAGGAACTGGACGGATATAATCCACCCCTCCACTTT                    | CIVRGGTGNQFYF_CASSQRNLGDYNSPLHF      | 53              | 0.013475718       |
| PFMC_AGLCD_T1 | 3              | TRAV8-2.TRAJ4.TRAC:GTGGTGTGAGGTATTTCTGGTGGCTACAATAAGCTGATTTT TRBV5-6.TRB1-6.TRBC2:GTGGCAGCAGCGCGGGGAGCAGCCAAATATCCCTCTGGGGCCCAAGTCTGACTTC          | CVVSVFSSGGYNLIF_CASAAGGNSHNPYSGANVLF | 50              | 0.012712942       |
| PFMC_AGLCD_T1 | 4              | TRAV35.TRAJ45.TRAC:GTGGCTGGTCTCGCAGATTCAAGGAGGCTGTCAGCGACTCACTTT TRBV5-5.TRB1-2.TRBC2:GTGGCAGCAGCTTTACCCCGCGCTCTGGGGCCCAAGTCTGACTTC                | CAGLADSGGGADLTF_CASSFPYGRSGANVLF     | 39              | 0.009916095       |
| PFMC_AGLCD_T1 | 5              | TRAV12-3.TRAJ24.TRAC:GTGGCAATGAGGTTAACTCAGCAGCGGGGAAATGCAAGTT TRBV7-6.TRB1-1.TRBC1:GTGGCAGCAGCTAGAGTGGTATGAAAGCTTTT                                | CAMRLDTSWGLQF_CASSLEGYEAF            | 33              | 0.008390542       |
| PFMC_AGLCD_T1 | 6              | TRAV35.TRAJ49.TRAC:GTGGTGGCTTTCGAACACCGGTAACCAAGTCTACTTT TRBV5-1.TRB1-2.TRBC1:GTGGCAGCAGCTTGAAGGGATGGCTACACCTTC                                    | CAGLSNNTGNQFYF_CASSLEGYGYTF          | 31              | 0.00782024        |
| PFMC_AGLCD_T1 | 7              | TRAV12-2.TRAJ4.TRAC:GTGGCGGTGATCCCTGTTCTGGTGGCTACAATAAGCTGATTTT TRBV20-1 TRBJ2-3.TRBC2:TGCAGTGTAGAGATGACCTGGACGGTCTTACACAGATACGCAGTATTT            | CAVILFSSGGYNLIF_CSARDRPRVLYDTQYF     | 29              | 0.007373506       |
| PFMC_AGLCD_T1 | 8              | TRAV12-1.TRAJ41.TRAC:GTGGTGGTGAACCTCTTATCCGGGTATGCACTCAACTTC TRBV5-6.TRB1-2.TRBC2:GTGGCAGCAGCGCGGGGAGCAGCCAAATATCCCTCTGGGGCCCAAGTCTGACTTC          | DVNVISYGYALNF_CASAAGGNSHNPYSGANVLF   | 28              | 0.007119247       |
| PFMC_AGLCD_T1 | 9              | TRAV16.TRAJ13.TRAC:GTGGCTGTGTGTGGGGTTACAGAAAGTTACTTT TRBV7-8.TRB1-2.TRBC2:GTGGCAGCAGCTGACAGTGGCCAGCAGCGGAGCTGTTTT                                  | CALVSSGGYQKVF_CASSLTDAGTGLF          | 28              | 0.007119247       |
| PFMC_AGLCD_T1 | 10             | TRAV35.TRAJ28.TRAC:GTGGTGGGAGCCCGGGGCTCCGGGCTGGAGTACCACTCACTTC TRBV20-1.TRB1-6.TRBC1:GTGGTGGTGGGCTTAACTCCCTCCACTTT                                 | CAGOPPASGAGYQTF_CSARGLNSPLHF         | 25              | 0.00636471        |
| PFMC_AGLCD_T2 | 1              | TRAV8-2.TRAJ4.TRAC:GTGGTGTGAGGTATTTCTGGTGGCTACAATAAGCTGATTTT TRBV5-6.TRB1-2.TRBC2:GTGGCAGCAGCTTTACCCCGCGCTCTGGGGCCCAAGTCTGACTTC                    | CVVSVFSSGGYNLIF_CASAAGGNSHNPYSGANVLF | 111             | 0.014302281       |
| PFMC_AGLCD_T2 | 2              | TRAV30.TRAJ49.TRAC:GTGGCAGCAGCACCGGTAAACAGTCTACTTT TRBV5-6.TRB1-5.TRBC1:GTGGCAGCAGCTTGGGGACCCCGGAGCAATCAGCCCGCAGCACTTT                             | CGTDTGNQFYF_CASSLWGRNSNPQHF          | 105             | 0.013529184       |
| PFMC_AGLCD_T2 | 3              | TRAV35.TRAJ49.TRAC:GTGGTGGCTTTCGAACACCGGTAACCAAGTCTACTTT TRBV5-1.TRB1-2.TRBC1:GTGGCAGCAGCTTGAAGGGATGGCTACACCTTC                                    | CAGLSNNTGNQFYF_CASSLEGYGYTF          | 74              | 0.009634854       |
| PFMC_AGLCD_T2 | 4              | TRAV35.TRAJ28.TRAC:GTGGTGGGAGCCCGGGGCTCCGGGCTGGAGTACCACTCACTTC TRBV20-1.TRB1-6.TRBC1:GTGGTGGTGGGCTTAACTCCCTCCACTTT                                 | CAGOPPASGAGYQTF_CSARGLNSPLHF         | 66              | 0.008504059       |
| PFMC_AGLCD_T2 | 5              | TRAV12-1.TRAJ41.TRAC:GTGGTGGTGAACCTCTTATCCGGGTATGCACTCAACTTC TRBV5-6.TRB1-2.TRBC2:GTGGCAGCAGCGCGGGGAGCAGCCAAATATCCCTCTGGGGCCCAAGTCTGACTTC          | CVNVISYGYALNF_CASAAGGNSHNPYSGANVLF   | 60              | 0.007730963       |
| PFMC_AGLCD_T2 | 6              | TRAV26-1.TRAJ49.TRAC:TGCATCGTCAGAGGAGGACCGGTAAACAGTCTACTTT TRBV4-2.TRB1-6.TRBC1:GTGGCAGCAGCAGGAACTGGACGGATATAATCCACCCCTCACTTT                      | CIVRGGTGNQFYF_CASSQRNLGDYNSPLHF      | 58              | 0.007473264       |
| PFMC_AGLCD_T2 | 7              | TRAV12-2.TRAJ4.TRAC:GTGGCGGTGATCCCTGTTTCTGGTGGCTACAATAAGCTGATTTT TRBV20-1 TRBJ2-3.TRBC2:TGCAGTGTAGAGATGACGCTGGACGGGCTTACACAGATACGCAGTATTTT         | CAVILFSSGGYNLIF_CSARDRPRVLYDTQYF     | 55              | 0.007086716       |
| PFMC_AGLCD_T2 | 8              | TRAV5.TRAJ4.TRAC:GTGGCAGAGACTTTCTGGTGGCTACAATAAGCTGATTTT TRBV5-6.TRB1-2.TRBC1:GTGGCAGCAGCTTGGGGACCGGGTACGCGCTACACTTC                               | CAETSSGGYNLIF_CASSWGGYGYTF           | 53              | 0.006829017       |
| PFMC_AGLCD_T2 | 9              | TRAV35.TRAJ45.TRAC:GTGGTGGCTTTCGAACACCGGTAACCAAGTCTACTTT TRBV5-6.TRB1-2.TRBC2:GTGGCAGCAGCTTTACCCCGCGCTCTGGGGCCCAAGTCTGACTTC                        | CAGLADSGGGADLTF_CASSFPYGRSGANVLF     | 50              | 0.006442469       |
| PFMC_AGLCD_T2 | 10             | TRAV12-1.TRAJ4.TRAC:GTGGTGGTACCCCTCTGTTCTGGTGGCTACAATAAGCTGATTTT TRBV4-1.TRB1-2.TRBC2:GTGGCAGCAGCAGGAACTAGCGGGGGCAAGTCTCCCTCAGCTCTACAATGACGAGTCTTC | CVVTRPSGGYNLIF_CASSOELAGGKPLSSYNEQF  | 34              | 0.004380879       |

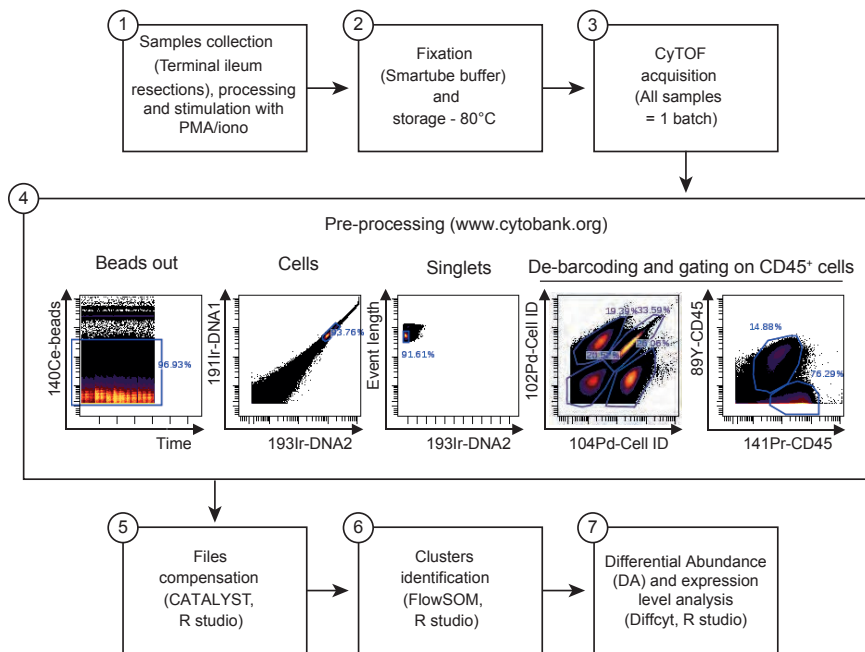

**Supplemental Figure 1. Experimental setup to characterize gut-resident immune cells via mass cytometry.** Lamina propria mononuclear cells (LPMCs) were isolated from terminal ileum samples obtained from 6 Crohn's disease (CD) patients, 4 non-IBD control patients and one AGLCD patient. Cells were stimulated with PMA/ionomycin for 4h before being stored at -80°C until acquisition. All the samples collected were acquired on a CyTOF2 mass cytometer in one batch. For data analysis, resulting flow cytometry standard (FCS) files were first normalized and then uploaded to Cytobank (www.cytobank.org) for gating of single, live cells and de-barcoding. Individual FCS files were compensated using the R package CATALYST and 17 clusters were identified using the R package FlowSOM. Differential abundance and expression level analyses were then done using the R package Diffcyt.

## Supplemental Figure 2

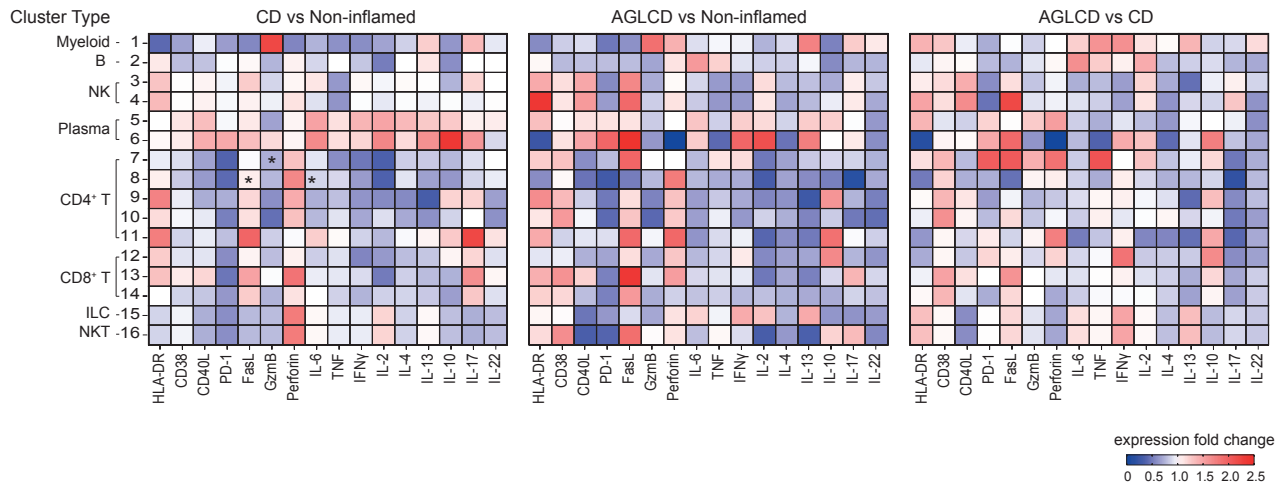

**Supplemental Figure 2. Differences in expression levels of activation markers, cytokines and pore-forming cytolytic proteins between AGLCD, CD, and non-inflamed control cell clusters.** LPMCs were isolated from AGLCD patient and controls (AGLCD: n=1, CD: n= 6, non-inflamed: n=4) and then activated for 4 h in vitro with PMA/ionomycin. Heatmaps show the median fold change of cytokines and activation marker expression in different immune cell populations. Significant differences were calculated using multiple t tests, \*P < 0.05.

Supplemental Figure 3

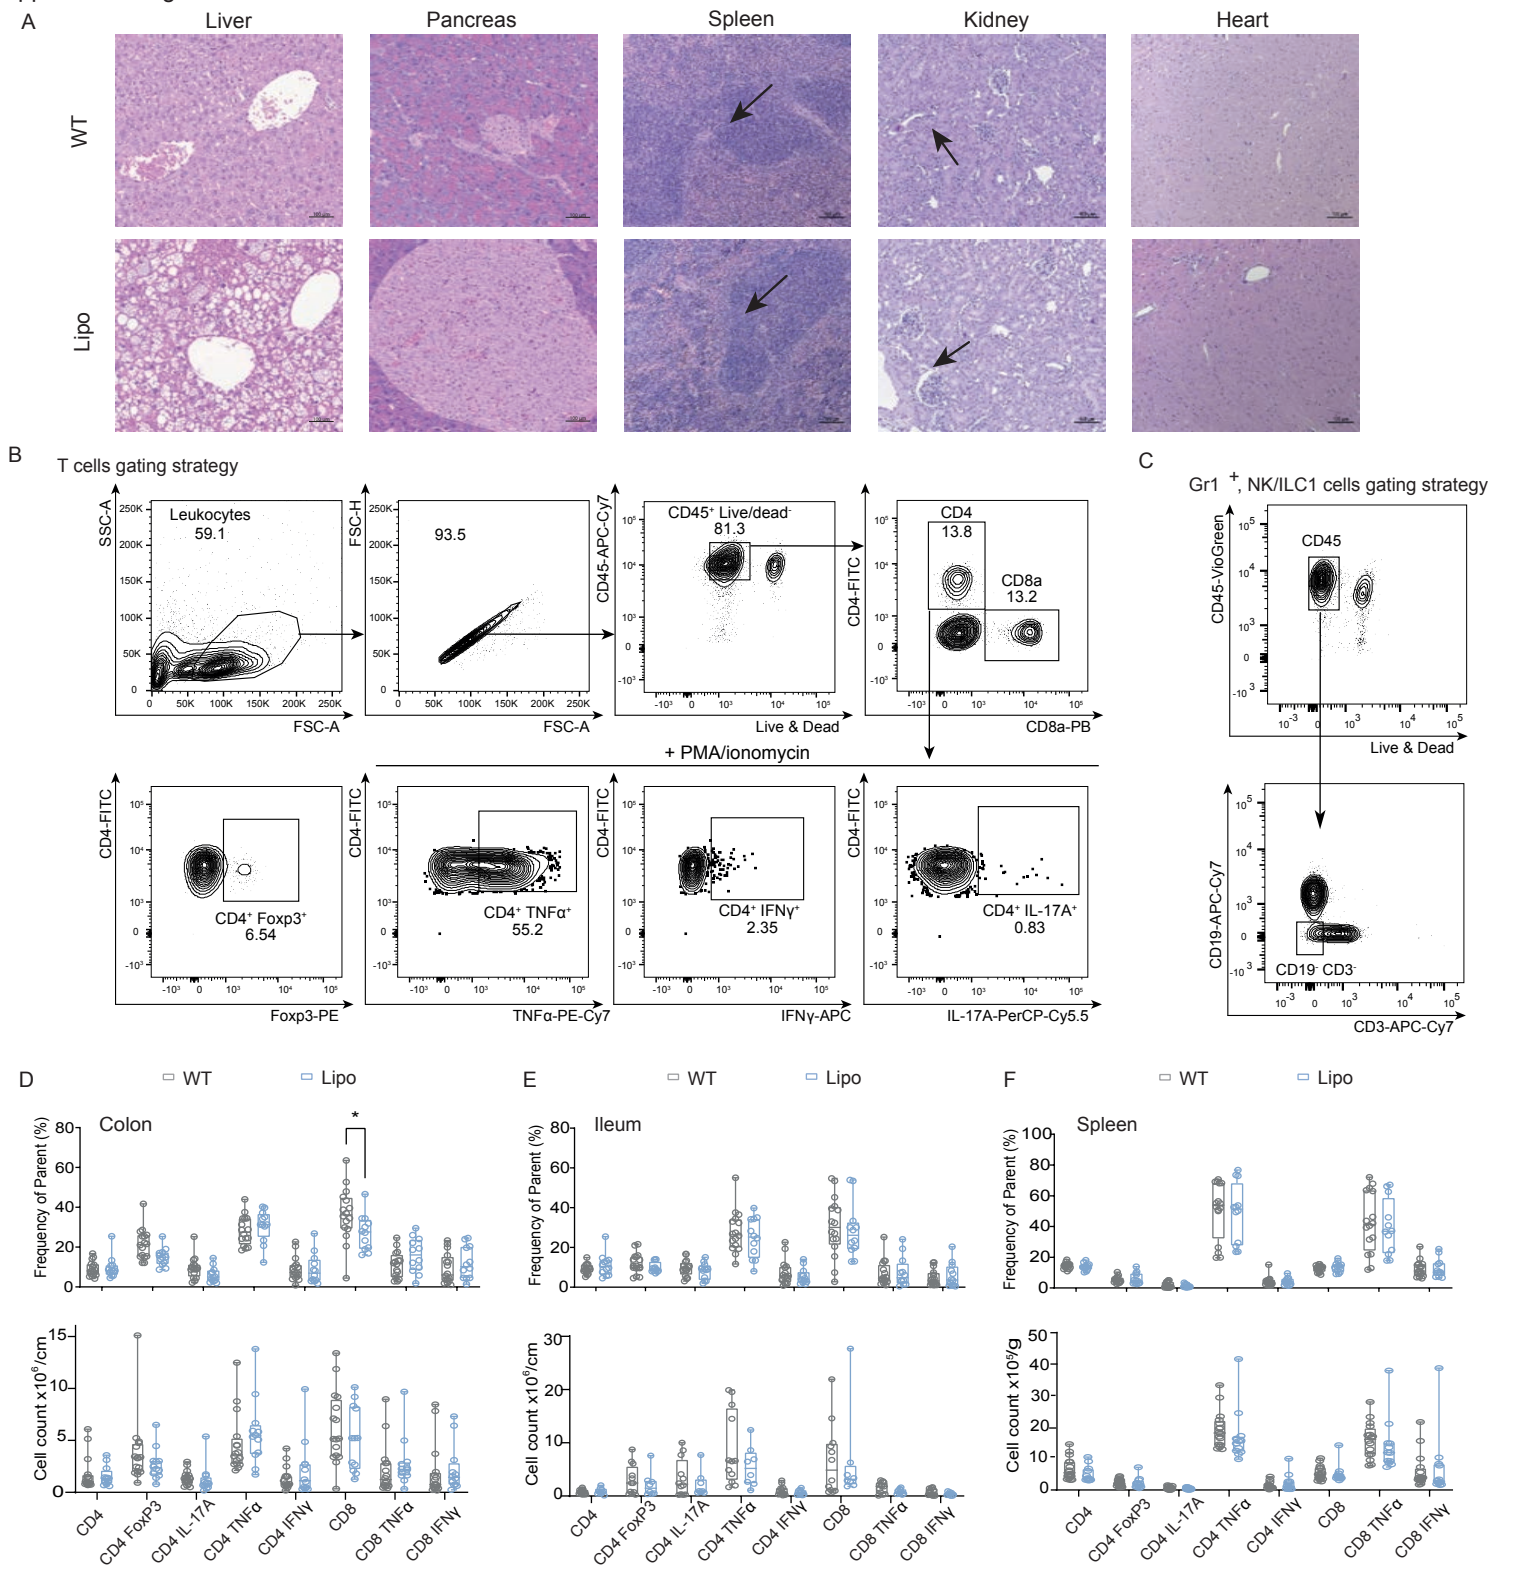

**Supplemental Figure 3. Characterization of steady state lipodystrophic and wild-type mice using histology and flow cytometry (A)** Representative histologic analyses of various organs obtained from wild-type (WT) and lipodystrophic (lipo) mice. Arrows point to the enlarged red pulp in the spleen and enlarged glomeruli in the kidney. **(B)** Immune cells isolated from spleen or intestinal tissues of WT and lipo mice were characterized using flow cytometry. Cells were gated for scattering (SSC-A/ FCS-A), then doublets (FSC-H/FSC-A) were excluded, and only live immune (CD45<sup>+</sup> Live&Dead<sup>+</sup>) cells were selected for further evaluation. For cytokine staining of CD4<sup>+</sup> or CD8<sup>+</sup> T cells, cells were stimulated in vitro for 4 h with PMA/ionomycin. **(C)** For NK/ILC1 cell populations, only live immune (CD45<sup>+</sup> Live&Dead<sup>+</sup>) cells that were also CD19<sup>-</sup>CD3<sup>+</sup> were selected for further evaluation. Box-and-whisker plots showing the frequency (top panels) and absolute cell counts (bottom panels) of indicated immune cell subsets in the colon **(D)**, ileum **(E)**, and spleen **(F)**. Data were pooled from n = 8-16 mice per group and analyzed by two-way ANOVA with Šidák's correction. Boxes range from the 25th to the 75th percentile. Whisker plots show the minimum (smallest) and maximum (largest) values. The line in the box indicates the median.

## Supplemental Figure 4

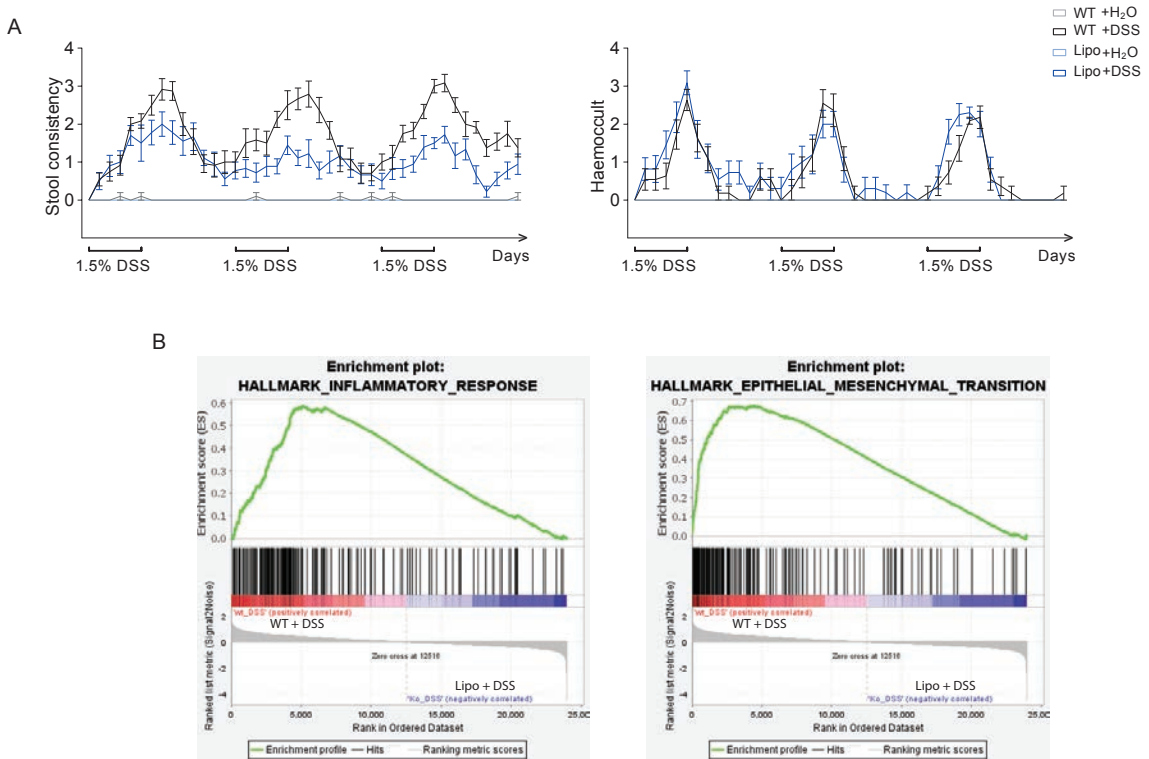

**Supplemental Figure 4. Lipodystrophic mice have less severe colitis and altered immune responses compared to WT mice in the chronic DSS model.** Mice received three cycles of 1.5% DSS and were monitored for (A) stool consistency and tested for haemocult blood during the experiment. Data was pooled from two independent experiments. Lines are projections of mean values, and the error bars represent the standard error mean. (WT+ H<sub>2</sub>O: n=10; WT+ DSS: n=11; Lipo + H<sub>2</sub>O: n=6; Lipo + DSS: n=11). (B) Gene set enrichment analysis (GSEA) plot showing upregulation of genes involved in the inflammatory response and epithelial-mesenchymal transition gene sets in the WT DSS-treated mice compared to lipodystrophic mice DSS-treated mice (n = 5 per group).

Supplemental Figure 5

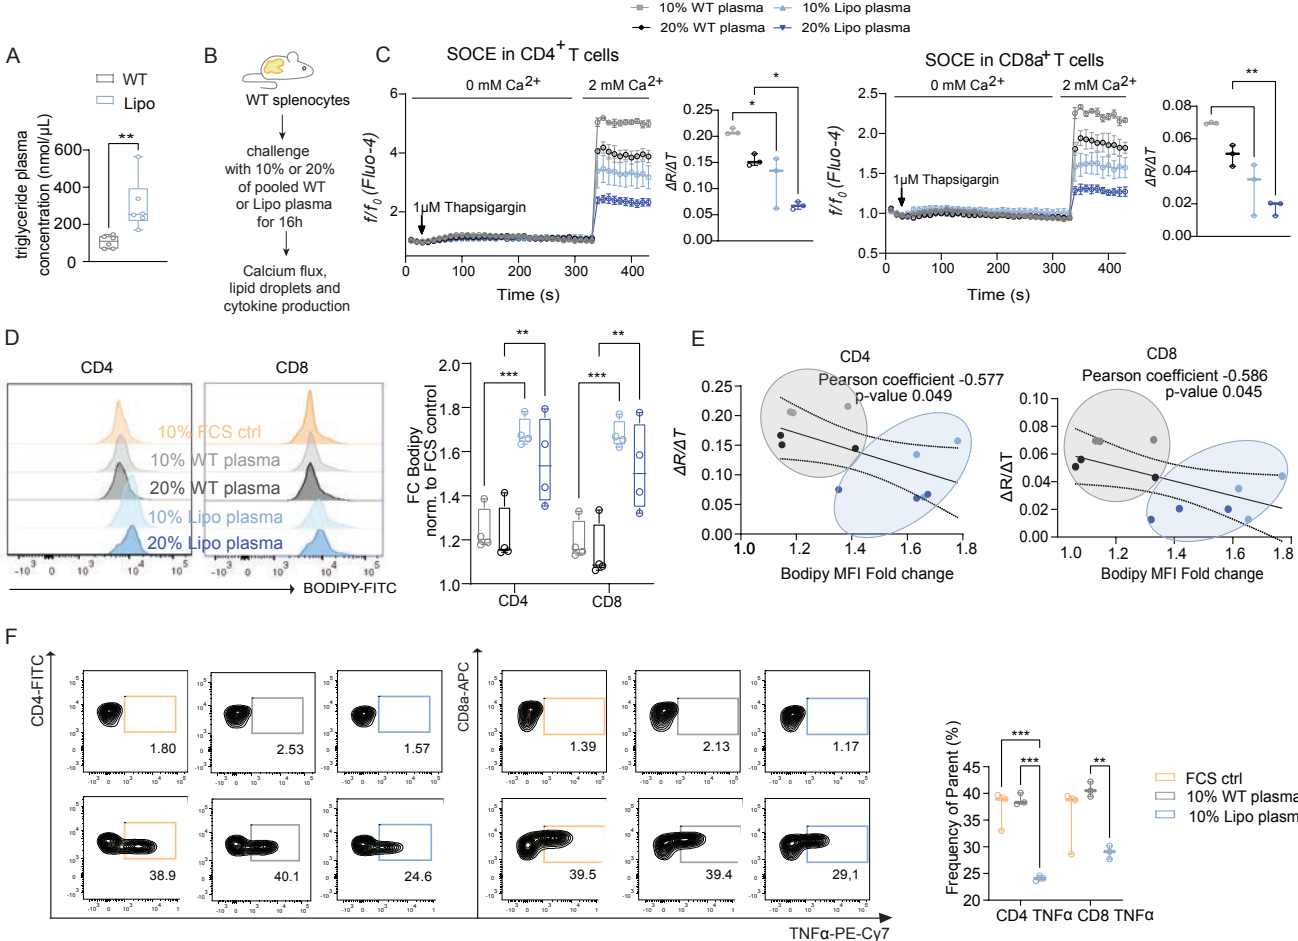

**Supplemental Figure 5. Exposure of wild-type splenocytes to triglyceride-containing plasma from lipodystrophic mice impairs Ca<sup>2+</sup> homeostasis.** (A) Triglyceride levels in plasma of lipo mice compared with WT controls (6 per group), as assessed by triglyceride assay quantification kit. (B) Experimental setup (C) Representative calcium traces and bar graphs quantifying store-operated calcium entry (SOCE) influx rate in CD4<sup>+</sup> and CD8<sup>+</sup> T cells after exposure to plasma from WT or lipo mice. (D) Histograms showing lipid droplet accumulation in WT splenocytes after challenge with plasma from WT or lipo mice. (E) Correlation plots between lipid droplet accumulation and calcium flux rates in CD4<sup>+</sup> and CD8<sup>+</sup> T cells after incubation in WT or lipo plasma overnight. Splens were collected from 3-4 mice and run in experimental triplicates. (F) TNF $\alpha$  production in T cells after 10% plasma exposure. Statistical test used for A and C was Mann-Whitney test and two-way ANOVA with Šidák's multiple comparisons test for D and F.

## Supplemental Figure 6

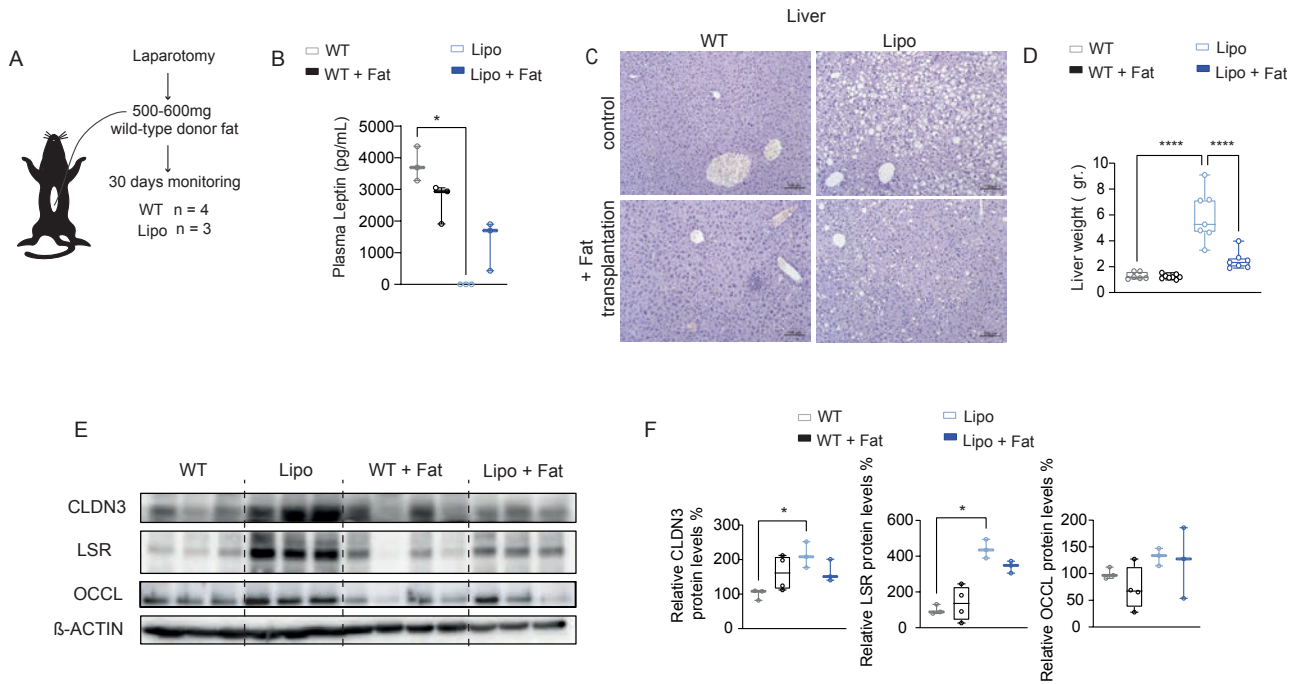

**Supplemental Figure 6. Allogenic fat transplantation reverses steatohepatitis and alters tight junction protein expression in lipodystrophic mice.** (A) Experimental design: lipodystrophic (Lipo) or wild-type (WT) mice were transplanted with 500-600 mg adipose tissue obtained from WT donor mice by performing mini-laparotomy. Mice were monitored for 30 days before organs were harvested for further experimentation. (B) Plasma levels of leptin. (C) Representative H&E staining of liver sections, (D) liver weight, (E) Western blot showing expression levels of TJs proteins isolated from the colon lamina propria of mice (WT: n = 3; WT + fat: n = 4; Lipo: n = 3; Lipo + fat: n = 3). (F) Whisker and box plots show relative expression of Claudin 3 (CLDN3), Lipoprotein receptor (LSR), Occludin (OCCL) proteins in lipoatrophic mice normalized to wild-type controls (WT= 100%). Boxes range from the 25th to the 75th percentile. Whisker plots show the minimum (smallest) and maximum (largest) values. The line in the box indicates the median (SEM). Statistics was calculated by one-way ANOVA test.

Supplemental Figure 7

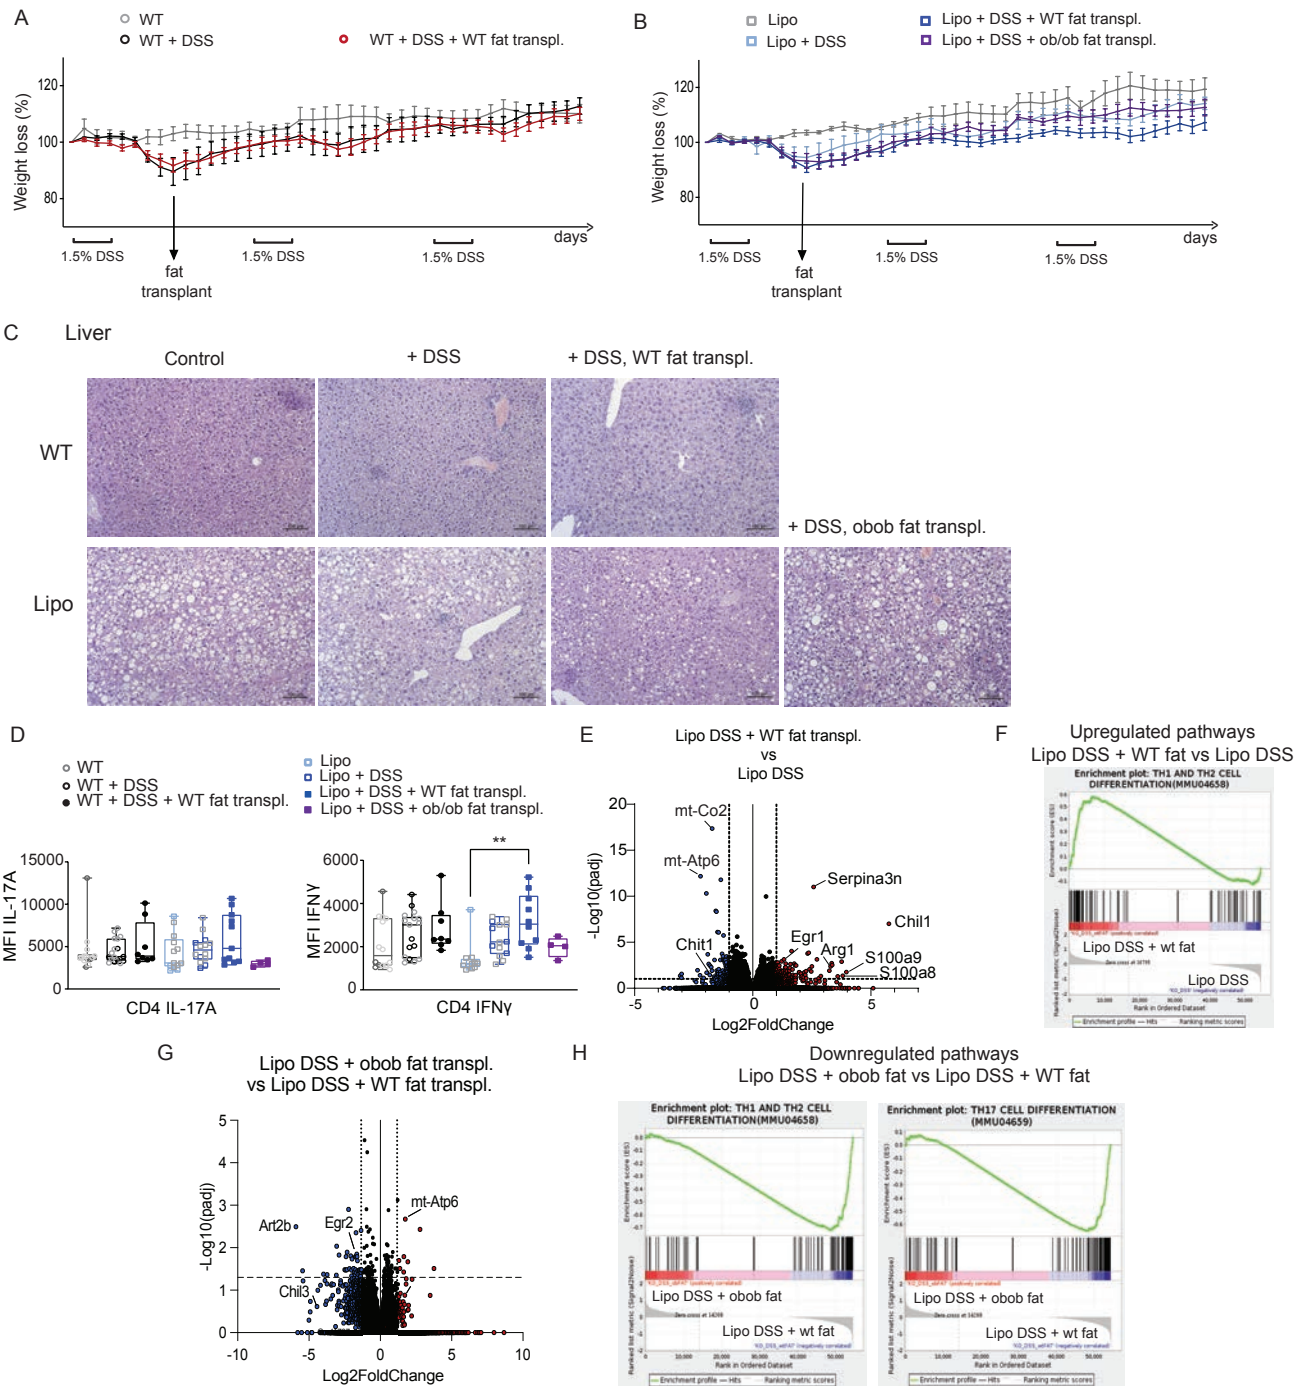

**Supplemental Figure 7. Lipodystrophic mice that received allogenic wild-type (WT) fat show reduced colitis compared to lipodystrophic mice that received allogenic ob/ob fat in the chronic DSS model.** Lipodystrophic (Lipo) or WT mice received 1 cycle of 1.5% DSS followed by transplantation with 500-600 mg adipose tissue obtained from WT or leptin-deficient ob/ob donor mice by performing mini-laparotomy. Seven days after transplantation, mice were subsequently challenged with 2 cycles of DSS treatment. Mice were monitored throughout the experiment and relative weight loss was recorded (**A**) for Lipo and (**B**) WT mice groups. Lines are projections of mean values. Data shown is pooled from 2 independent transplantation experiments (n=4-13). (**C**) Representative H&E staining of liver sections (**D**) Box-and-whisker plots summarizing MFI IFN $\gamma$ - and IL-17A-producing CD4 $^{+}$  T cells normalized to WT mice (n=4-18; pooled from five experiments). Statistical differences were calculated using the Mann-Whitney U test. (**E**) Volcano plot showing differentially regulated genes between DSS-treated Lipo mice that received WT fat and DSS-treated Lipo mice (n=6 per group). (**F**) Gene set enrichment analysis (GSEA) plot showing upregulation of genes involved in Th1 and Th2 cell differentiation in DSS-treated lipodystrophic that received WT fat and DSS-treated Lipo mice. (**G**) Volcano plot showing differentially regulated genes in DSS-treated Lipo mice that received ob/ob fat compared to DSS-treated Lipo mice that received WT fat (n=4-6). (**H**) GSEA plot showing downregulation of genes involved in Th1, Th2 and Th17 cell differentiation in DSS-treated Lipo mice that received ob/ob fat and DSS-treated Lipo mice that received WT fat.

## Supplemental Figure 8

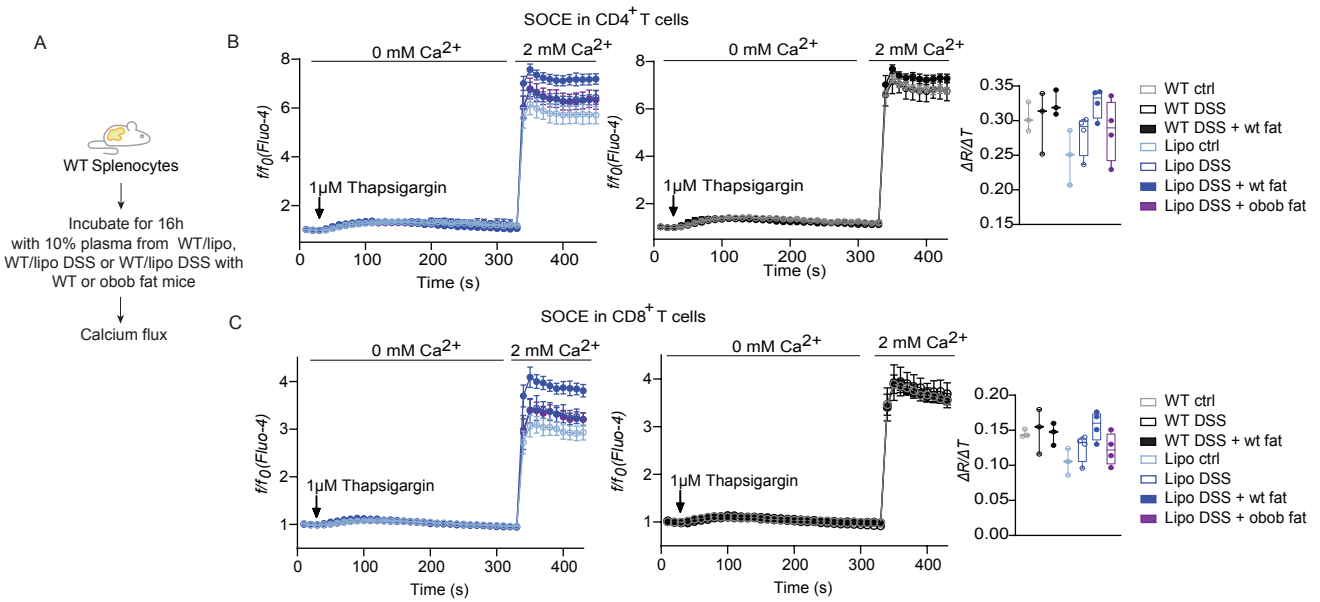

**Supplemental Figure 8. Improved SOCE in T cells after challenge with plasma from fat-transplanted lipodystrophic mice.** (A) Experimental setup of plasma-challenge experiments. Representative calcium traces and bar graphs quantifying store-operated calcium entry (SOCE) in wild-type (B) CD4<sup>+</sup> and (C) CD8<sup>+</sup> T cells after exposure to plasma derived from WT or lipo control mice, DSS-treated WT or lipo mice, DSS-treated WT or lipo mice transplanted with WT fat, or DSS-treated lipo mice transplanted with ob/ob fat (n=3-4)

## Supplemental Figure 9

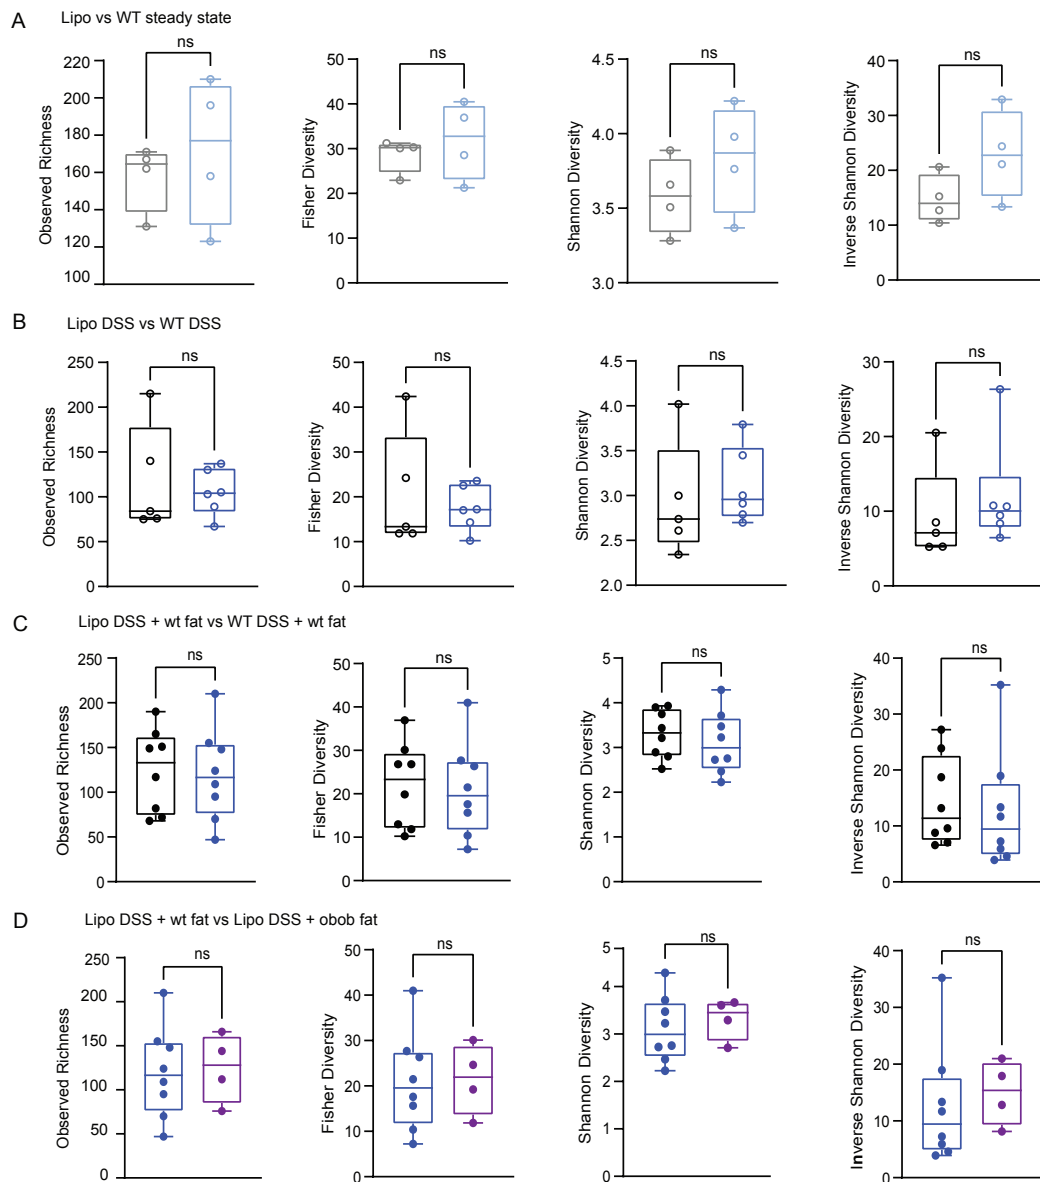

**Supplemental Figure 9. The gut microbiota is not significantly altered in lipodystrophic mice compared to wt littermates.** Alpha diversity was assessed using 16S rRNA gene sequencing and is presented as box-and-whisker plots for Observed Richness, Fisher Diversity, Shannon Diversity, and Inverse Shannon Diversity for the following comparisons **(A)** Lipo (n=4) vs WT (n=4) mice at steady state, **(B)** DSS-treated lipo mice (n=5) vs DSS-treated WT mice (n=4), **(C)** DSS-treated lipo mice + wt fat (n=8) vs DSS-treated WT mice + wt fat (n=8), and **(D)** DSS-treated lipo mice + wt fat (n=8) vs DSS-treated lipo mice + ob/ob fat (n=4). Each point represents an individual mouse. Statistical comparisons between groups were performed using Pairwise Wilcoxon Tests.
